# Supplementary material for: Ferroelectric low-voltage ON/OFF switching of chiral benzene-1,3,5-tricarboxamide derivative
Source: Royal Society of Chemistry journal article supplement (doi:10.1039/d0tc02414g), 2020-01-01
Supplement: d0tc02414g1.pdf [file d0tc02414g1.pdf]

## Supporting Information

### Ferroelectric Low-Voltage ON/OFF Switching of Chiral Benzene-1,3,5-tricarboxamide Derivative

Jianyun Wu, Takashi Takeda, Norihisa Hoshino, and Tomoyuki Akutagawa

#### Contents

##### Experimental

**Figure S1.** TG diagram of *S*-**3BC** and **3BC**.

**Figure S2.** IR spectra of **3BC** and *S*-**3BC** at KBr pellets.

**Figure S3.** Photographs of molecular assembly of *S*-**3BC**.

**Figure S4.** SEM images of xerogels of *S*-**3BC** on HOPG.

**Figure S5.** AFM images of xerogels of *S*-**3BC** on mica surface.

**Figure S6.** Temperature-dependent texture changes of the POM observation.

**Figure S7.** POM images of lyotropic liquid crystal phase in toluene at 298 K.

**Figure S8.** *T*- and *f*-dependent imaginary parts dielectric constants  $\epsilon_2$  of *S*-**3BC**.

**Figure S9.**  $\ln(\tau) - T_{p1}^{-1}$  plots of *S*-**3BC**.

**Figure S10.** Time-dependent polarization decay of *S*-**3BC** and **3BC**.

**Figure S11.** Remanant polarization *P* – *E* hysteresis curve of **3BC** at 393 K.

**Figure S12.** *T*-dependent IR spectra of *S*-**3BC**.

**Figure S13.** *T*-dependent IR spectra of **3BC**.

**Table S1.** Organogellation ability of *S*-**3BC**.

## Experimental

**General and physical measurements.** Chiral **S-3BC** was synthesized from 1,3,5-benzenetricarbonyl trichloride and homochiral (*S*)-3,7-dimethyloctylamine according to the literature (Anal. Calcd. for  $C_{39}H_{69}N_3O_3$ : C, 74.59; H, 11.08; N, 6.69. Found: C, 74.37; H, 11.28; N, 6.67).<sup>S1,S2</sup> Solid state infrared (IR, 400–4000  $cm^{-1}$ ) spectra were measured in KBr pellets using a Thermo Fisher Scientific Nicolet 6700 spectrophotometer with a resolution of 4  $cm^{-1}$ . Thermogravimetry–differential thermal analysis (TG-DTA) was carried out using a Rigaku Thermo Plus TG8120 thermal analysis station using an  $Al_2O_3$  reference in the temperature range above 300 K with a heating rate of 5  $K\ min^{-1}$  under  $N_2$ . Differential scanning calorimetry (DSC) analyses were carried out using METTLER DSC1-TS using an  $Al_2O_3$  reference and a heating and cooling rate of 5  $K\ min^{-1}$  under nitrogen. Temperature-dependent powder X-ray diffraction patterns (PXRD) were obtained using a Rigaku Rint-Ultima III diffractometer with  $Cu\ K\alpha$  radiation at  $\lambda = 1.54187\ \text{\AA}$  in the temperature range of 200 to 340 K. The temperature-dependent dielectric constants were measured using the two-probe AC impedance method in a frequency range from 1 kHz to 1 MHz (Hewlett-Packard, HP4194A) in a Linkam-LTS350 temperature control system. The *P–E* curve was measured using a ferroelectric tester (Precision LC, Radiant Technologies). The cast films were fabricated on indium tin oxide (ITO) glass (SZ-A311P6N) substrates, which were sandwiched together with a corresponding ITO glass. The electrode area and gap were 1  $cm^2$  and 2  $\mu m$ , respectively.

## References

- S1) Brunsveld, L.; Schenning, A. P. H. J.; Broeren, M. A. C.; Janssen, H. M.; Vekemans, J. A. J. M.; Meijer, E. W. Chiral Amplification in Columns of Self-Assembled *N,N',N''*-Tris((*S*)-3,7-dimethyloctyl)benzene-1,3,5-tricarboxamide in Dilute Solution, *Chem. Lett.* **2000**, 292–293.
- S2) Wilson, A. J.; Masuda, M.; Sijbesma, R. P. Meijer, E. W. Chiral Amplification in the Transcription of Supramolecular Helicity into a Polymer Backbone. *Angew. Chem., Int. Ed.* **2005**, 44, 2275–2279.

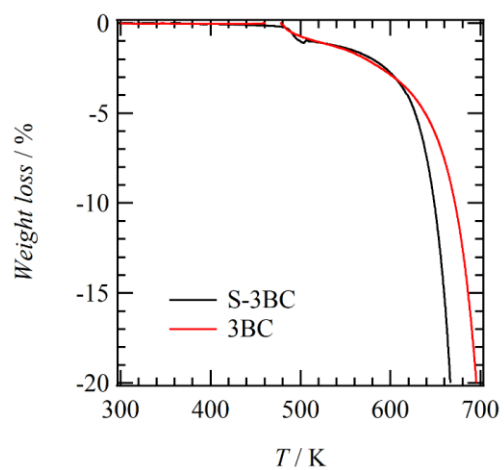

**Figure S1.** TG charts of **3BC** and **S-3BC**.

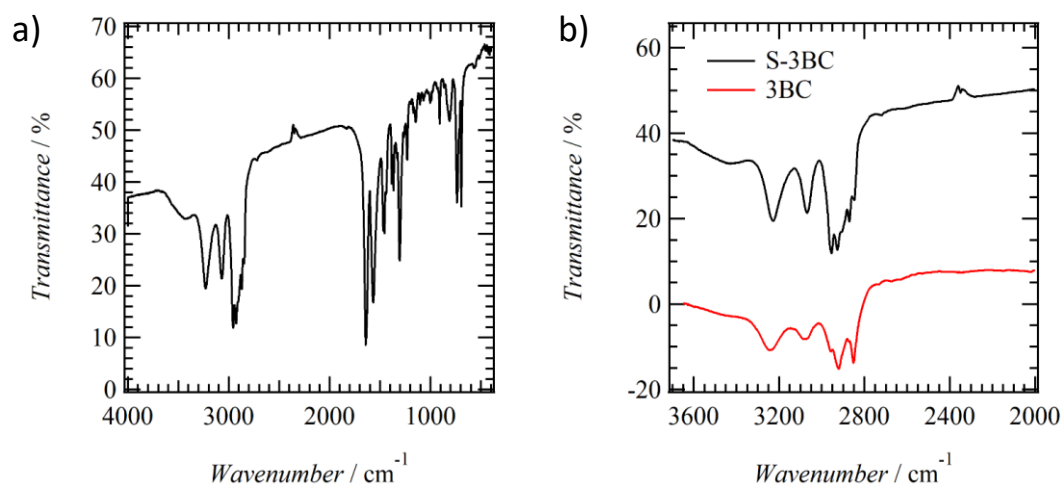

**Figure S2.** IR spectra of **3BC** and **S-3BC** at KBr pellets. Energy range at a) 400 ~ 4000  $\text{cm}^{-1}$  and b) 2000 ~ 3700  $\text{cm}^{-1}$ .

**Table S1.** Organogellation ability of **S-3BC** in the organic solvents.

| Solvent             | <b>3BC</b> | <b>S-3BC</b> |
|---------------------|------------|--------------|
| m.p., K             | 467        | 514          |
| Ethanol             | OG         | L            |
| Acetonitrile        | OG         | TG           |
| Acetone             | OG         | OG           |
| Hexane              | TG         | ×            |
| Benzene             | L          | TG           |
| Toluene             | L          | TG           |
| Cyclohexane         | L          | TG           |
| Chloroform          | L          | L            |
| DMF                 | OG         | L            |
| DMSO                | OG         | OG           |
| 1, 2-Dichloroethane | OG         | ×            |

a) Concentration was fixed at 20 mM. Notations of ×, L, OG, and TG corresponded to the insoluble, soluble, opaque organogel, and transparent organogel, respectively.

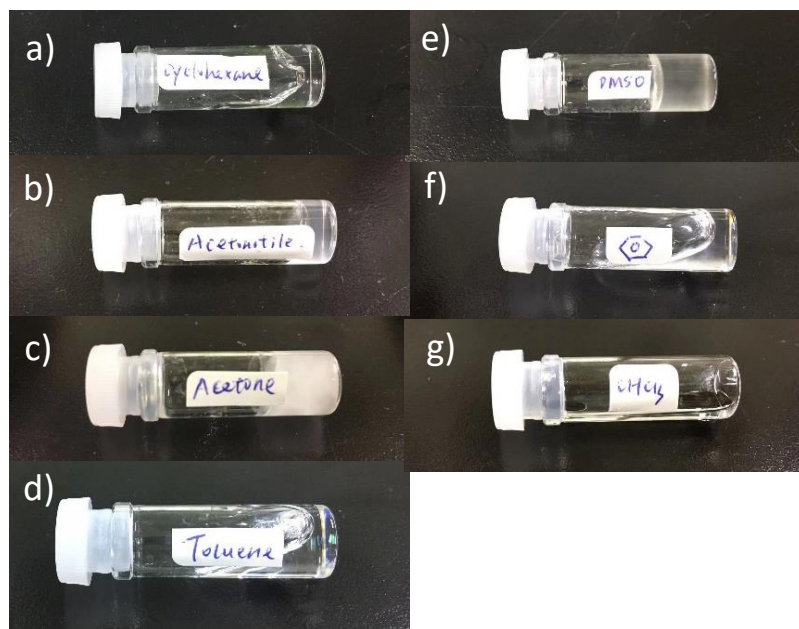

**Figure S3.** Photographs of molecular assembly of *S-3BC* in a) cyclohexane, b) acetonitrile, c) acetone, d) toluene, e) DMSO, f) benzene, and g)  $\text{CHCl}_3$ .

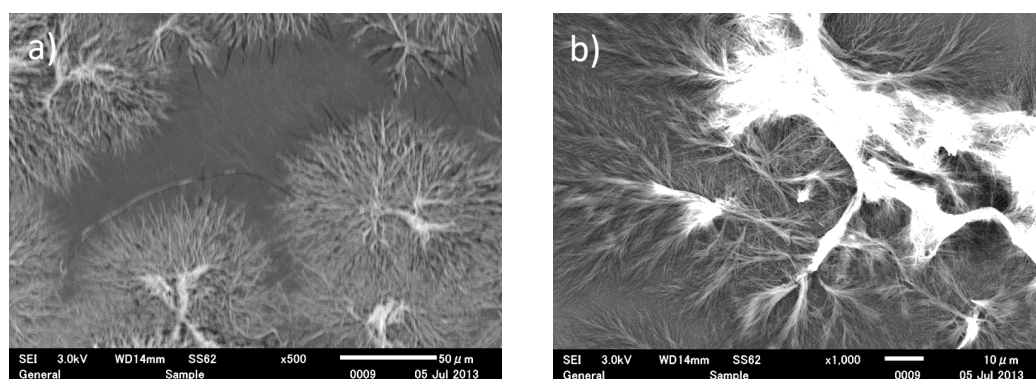

**Figure S4.** SEM images of xerogels of *S-3BC* on HOPG substrate surface, fabricated by the spin-coat technique. Scale-bar of a) 50 and b) 10  $\mu\text{m}$ , respectively.

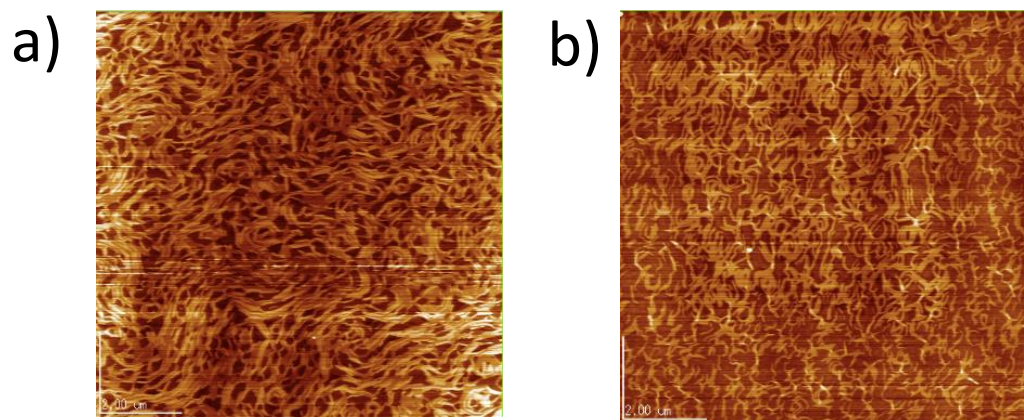

**Figure S5.** AFM images of xerogels of *S-3BC* on mica surface, fabricated by the spin-coat technique of toluene solution with a fixed concentration of 20 mM. Rotation speed of spinner at a) 500 and b) 1000 rpm, respectively. Scale-bar is 2  $\mu\text{m}$ .

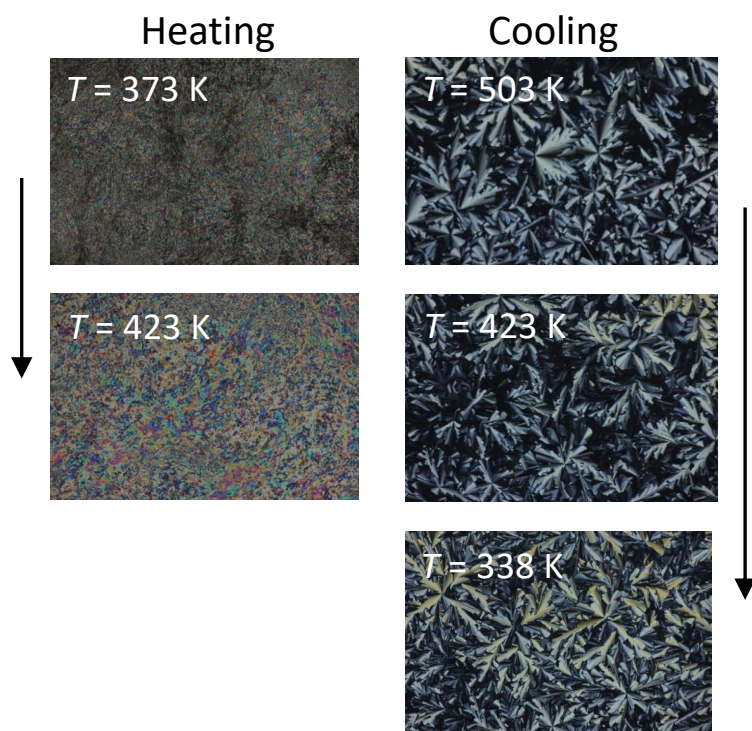

**Figure S6.** Temperature-dependent texture changes of the POM observation in the heating and cooling processes under the cross-Nicol optical arrangement.

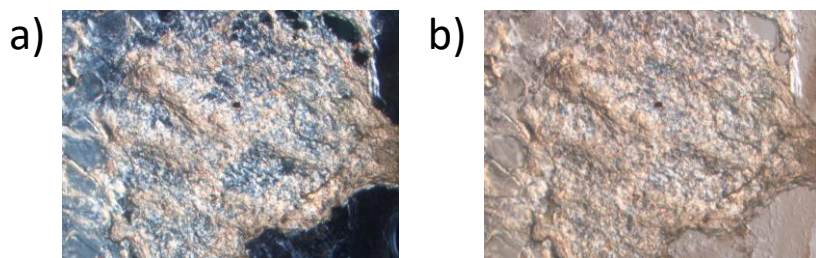

**Figure S7.** POM images of lyotropic liquid crystal phase in toluene at 298 K with a fixed concentration of 20 mM.

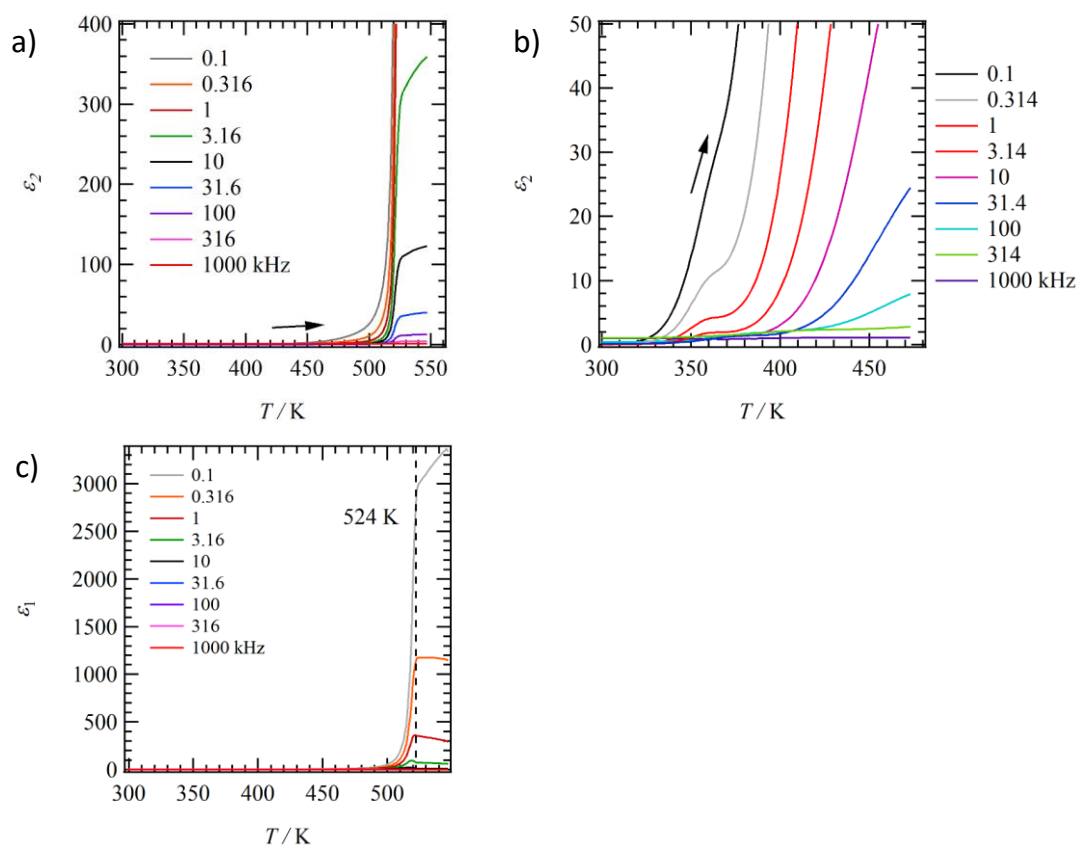

**Figure S8.**  $T$ - and  $f$ -dependent imaginary parts dielectric constants  $\epsilon_2$  of **S-3BC**. a) Overall  $\epsilon_2$ -responses to clarify the  $\text{Col}_h$  – IL phase transition and b) the expanded  $\epsilon_2$ -response to clarify the S –  $\text{Col}_h$  phase transition.

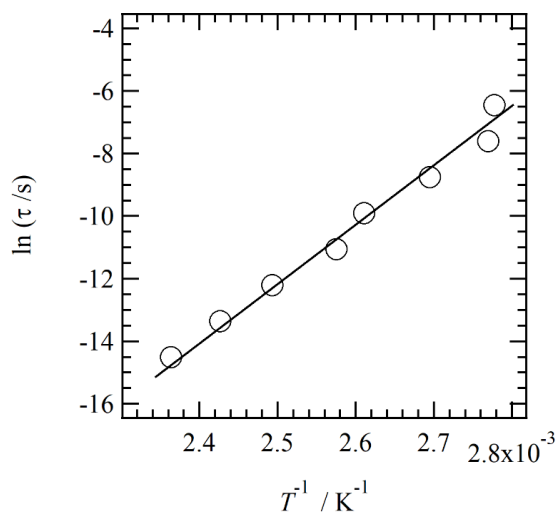

**Figure S9.**  $\ln(\tau) - T_{\text{pl}}^{-1}$  plots of **S-3BC**, where the  $\tau$ -value was a relaxation time of the inverse of measurement  $f$ -values of the  $\tau = 1/(2\pi f)$ .

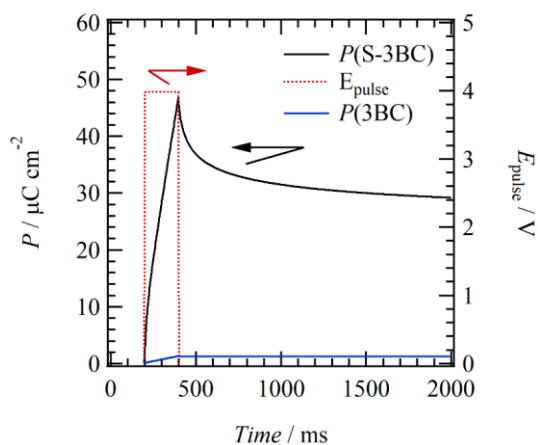

**Figure S10.** Time-dependent polarization decay of **S-3BC** (black) and **3BC** (blue) after the pulse voltage application (red).



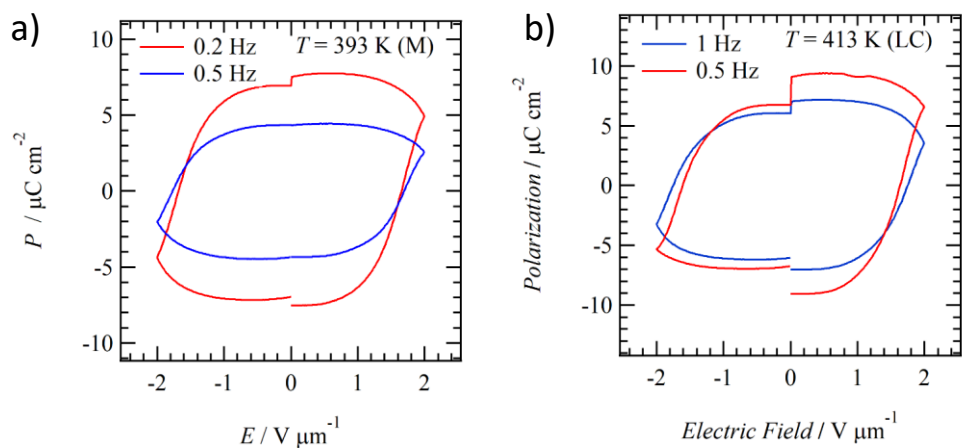

**Figure S11.** Remanent polarization  $P - E$  hysteresis curve of **3BC** a) at 393 K with  $f = 0.2$  and 0.5 Hz and b) at 414 K with  $f = 1$  and 0.5 Hz.

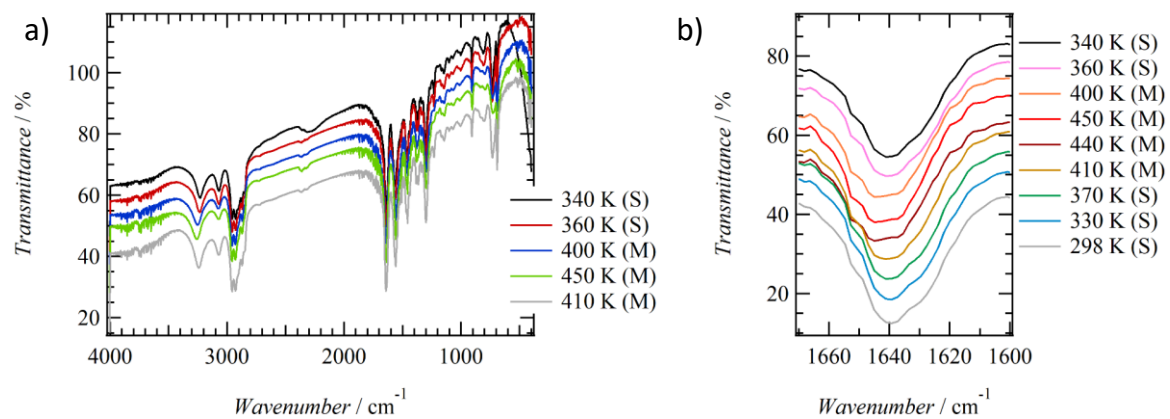

**Figure S12.**  $T$ -dependent IR spectra of **S-3BC** at the energy range of a) 400 ~ 4000  $\text{cm}^{-1}$  and b) 1600 ~ 1700  $\text{cm}^{-1}$ .

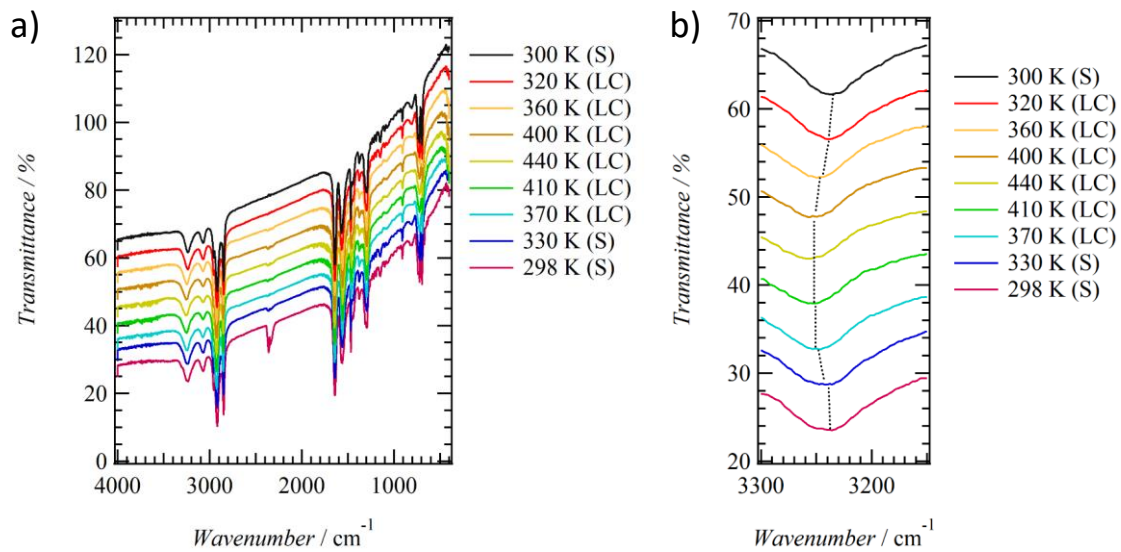

**Figure S13.**  $T$ -dependent IR spectra of **3BC** at the energy range of a) 400 ~ 4000  $\text{cm}^{-1}$  and b) 3100 ~ 3300  $\text{cm}^{-1}$ .
